# Supplementary material for: Mitochondrial GpC and CpG DNA Hypermethylation Cause Metabolic Stress-Induced Mitophagy and Cholestophagy
Source: MDPI journal article supplement (doi:10.3390/ijms242216412), 2023-11-16
Supplement: s1 [file s1]

## Supplementary material

**Table S1:** Overview of qPCR and PCR primers used in this study.

| Gene    | Forward primer (5' → 3')  | Reverse primer (5' → 3')  |
|---------|---------------------------|---------------------------|
| B2M     | TGCTGTCTCCATGTTTGATGTATCT | TCTCTGCTCCCCACCTCTAAGT    |
| GSTA1   | GCAGACCAGAGCCATTCTCAAC    | ACATACGGGCAGAAGGAGGATC    |
| GSTA2   | CTGCCCTTTAGTCAACCTGAGG    | ACAAGGTAGTCTTGTCCGTGGC    |
| NR5a2   | GGCTTATGTGCAAAATGGCAGATC  | GCTCACTCCAGCAGTTCTGAAG    |
| SLC22a7 | CCTTCACCACTGCCTACCTGTT    | ACAGCCCACTCCATCCAGCAA     |
| mtND1   | ATACCCCCGATTCCGCTACGAC    | GTTTGAGGGGGAATGCTGGAGA    |
| mtCOX1  | CGATGCATACACCACATGAA      | AGCGAAGGCTTCTCAAATCA      |
| mtCYB   | AATTCTCCGATCCGTCCCTA      | GGAGGATGGGGATTATTGCT      |
| Sall3   | GTTTGGGTTTGGTTTTTGT       | ACCCTTTACCAATCTCTTAACCTTC |

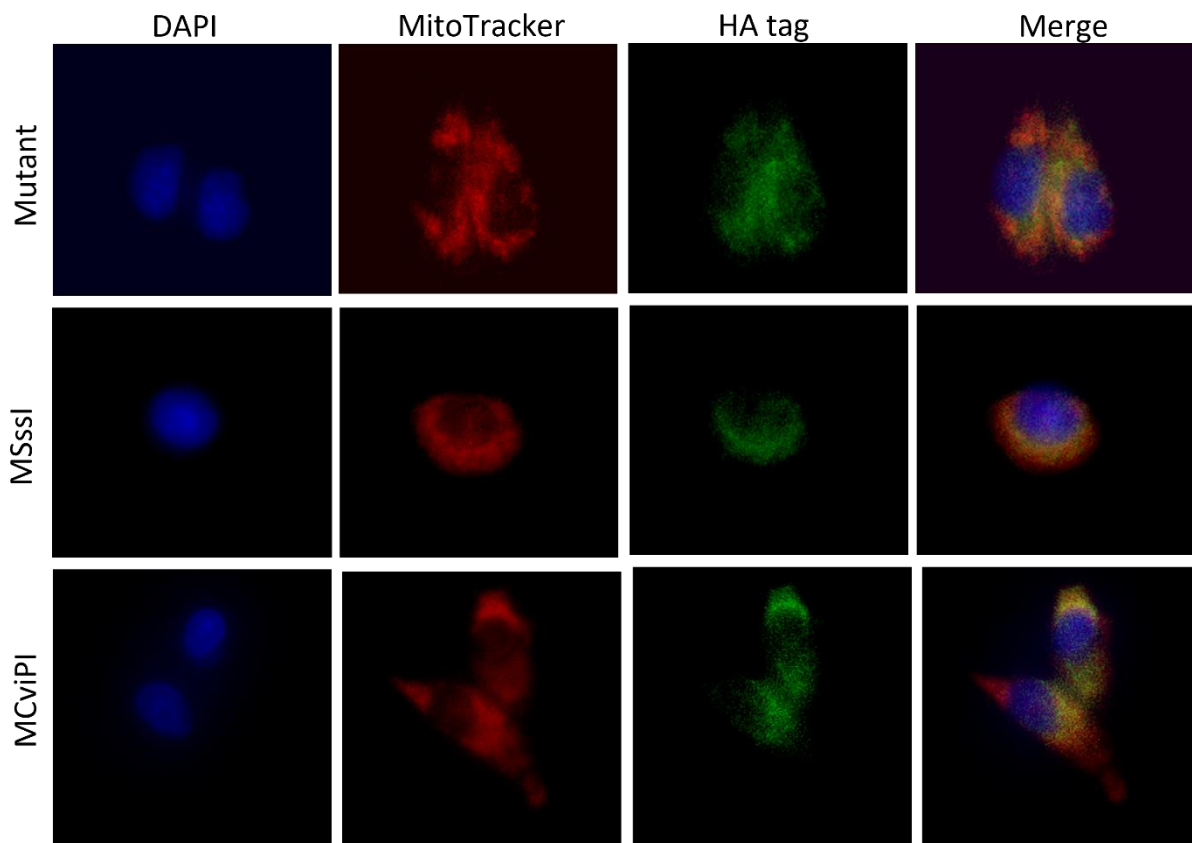

**Figure S1:** Colocalisation of overexpressed deficient MCviPI (Mutant), MSsI or MCviPI DNMT and mitochondria in HepG2 cells. Images showing immunofluorescence staining with anti-HA-tag targeting the overexpressed MSsI, MCviPI or MCviPI Mutant DNMT (green), the nucleus stained with dapi, the mitochondria stained with Mitotracker (red) and an overlay of these images in all three overexpressing cell lines.

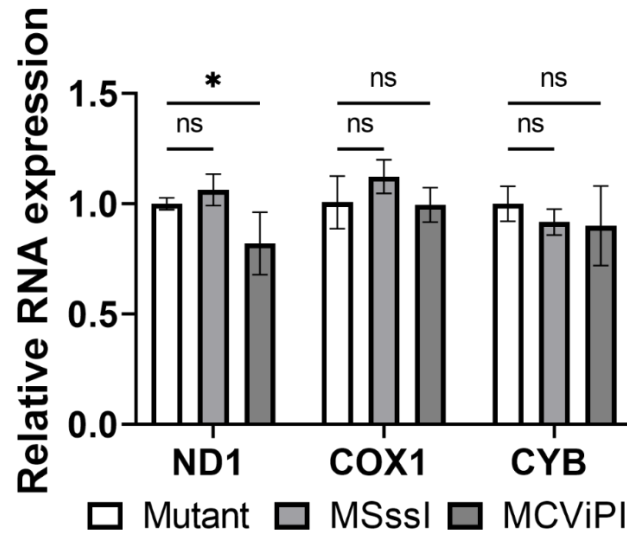

**Figure S2:** Mitochondrial gene expression. Relative mRNA expression in three different HepG2 cell lines overexpressing a GpC DNMT MCViPI (MCViPI), a CpG DNMT (MSssl) or overexpressing a GpC/CpG DNMT deficient MCViPI mutant (Mutant). Cells were left untreated (none) (n=3 independent biological replicates). Data is shown as mean  $\pm$  s.d.; (ns= not significant; \*  $p < 0.05$ , Two-way ANOVA).

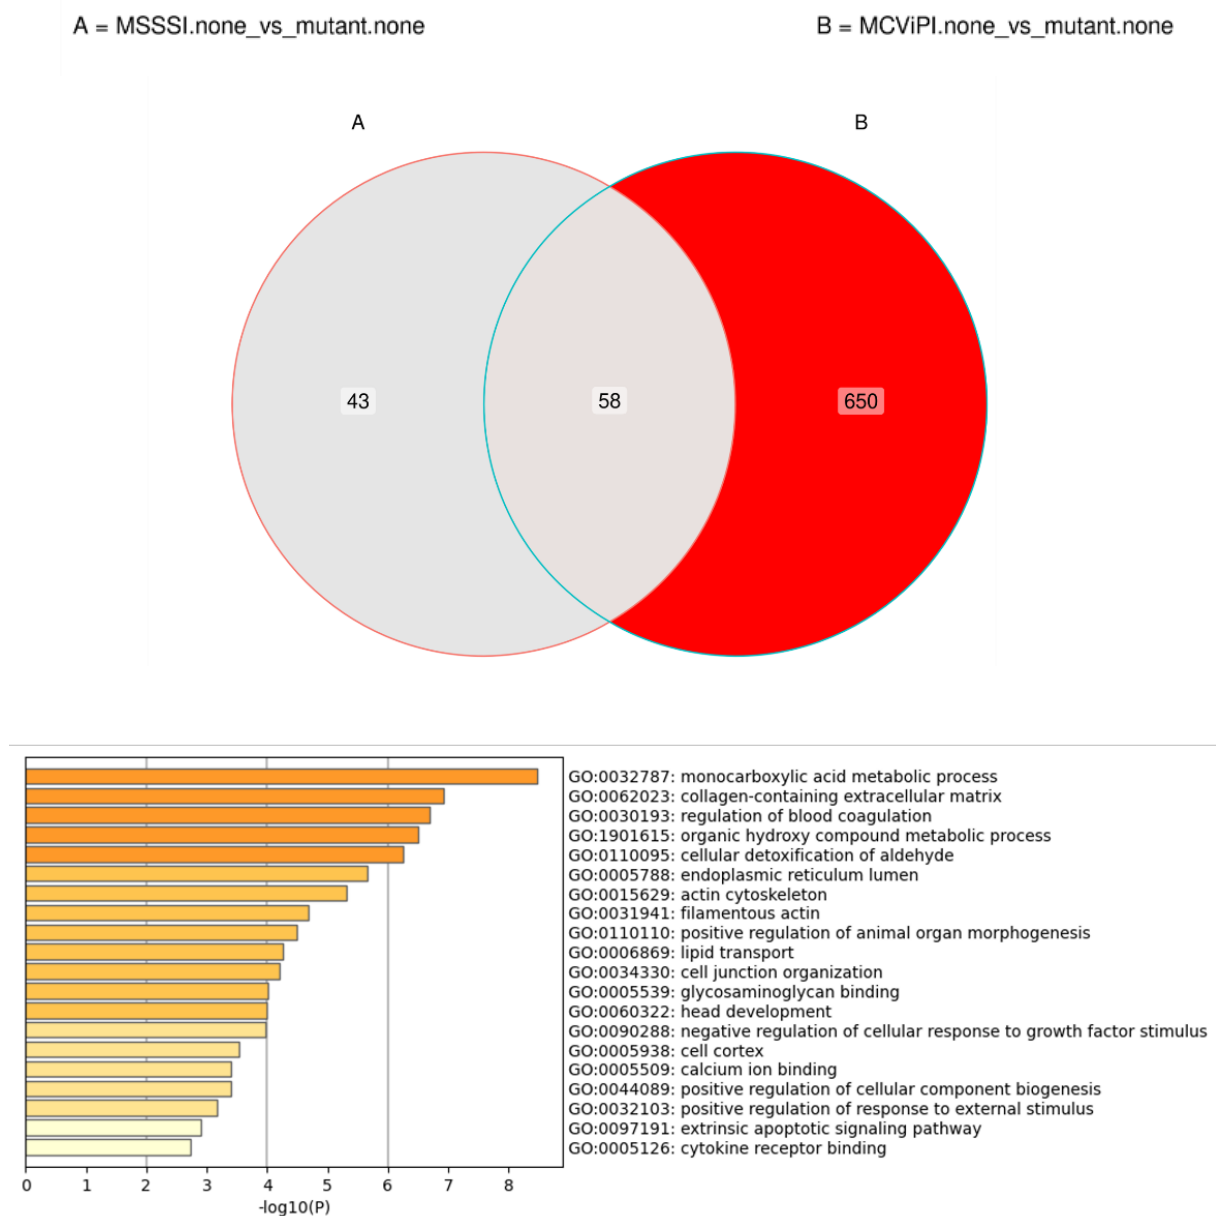

**Figure S3:** Differential gene expression induced by mitochondrial CpG and/or GpC hypermethylation. Venn diagram showing overlapping differentially expressed genes (FDR<0.05; log<sub>2</sub>FC >|0.2|) in the different comparisons between untreated (none) GpC MCviPI and CpG MSsI overexpressing cell lines compared to untreated control cell line MCviPI mutant (top). Metascape GO pathway analysis of the 58 overlapping genes (bottom).

**Table S2:** List of overlapping differentially expressed genes induced by mitochondrial CpG and GpC hypermethylation. Gene names of overlapping differentially expressed genes (FDR<0.05; logFC >|0.2|) in the different comparisons between untreated (none) GpC MCviPI and CpG MSssI overexpressing cell lines compared to untreated control cell line MCviPI mutant.

|         |          |         |          |
|---------|----------|---------|----------|
| GSTA1   | PLAU     | ZNF678  | VLDLR    |
| GSTA2   | AKR1B10  | ALDH1A1 | ATP10A   |
| COL2A1  | SERPINC1 | IL1RAP  | SERPINE2 |
| CDH1    | ADH4     | NR1H4   | MYL9     |
| SPARC   | SSC4D    | VAV3    | SLC2A1   |
| C6      | CLDN6    | SAT2    | CEBPD    |
| COL16A1 | SYNPO    | CLK1    | ASB4     |
| UGT2B4  | MYO1A    | DMKN    | BEX3     |
| CES1    | SULT2A1  | BTG2    | ABCA3    |
| MAGED4  | SULF2    | CARMIL1 | MATN3    |
| CXCL8   | PARD6B   | FRS2    | PARP16   |
| DLX1    | CCDC69   | IGSF1   | EDN1     |
| HPX     | NPNT     | DKK1    | ISM2     |
| SMTNL2  | LIPC     | BAG3    |          |
| UGT2B11 | PTGR1    | EMILIN1 |          |

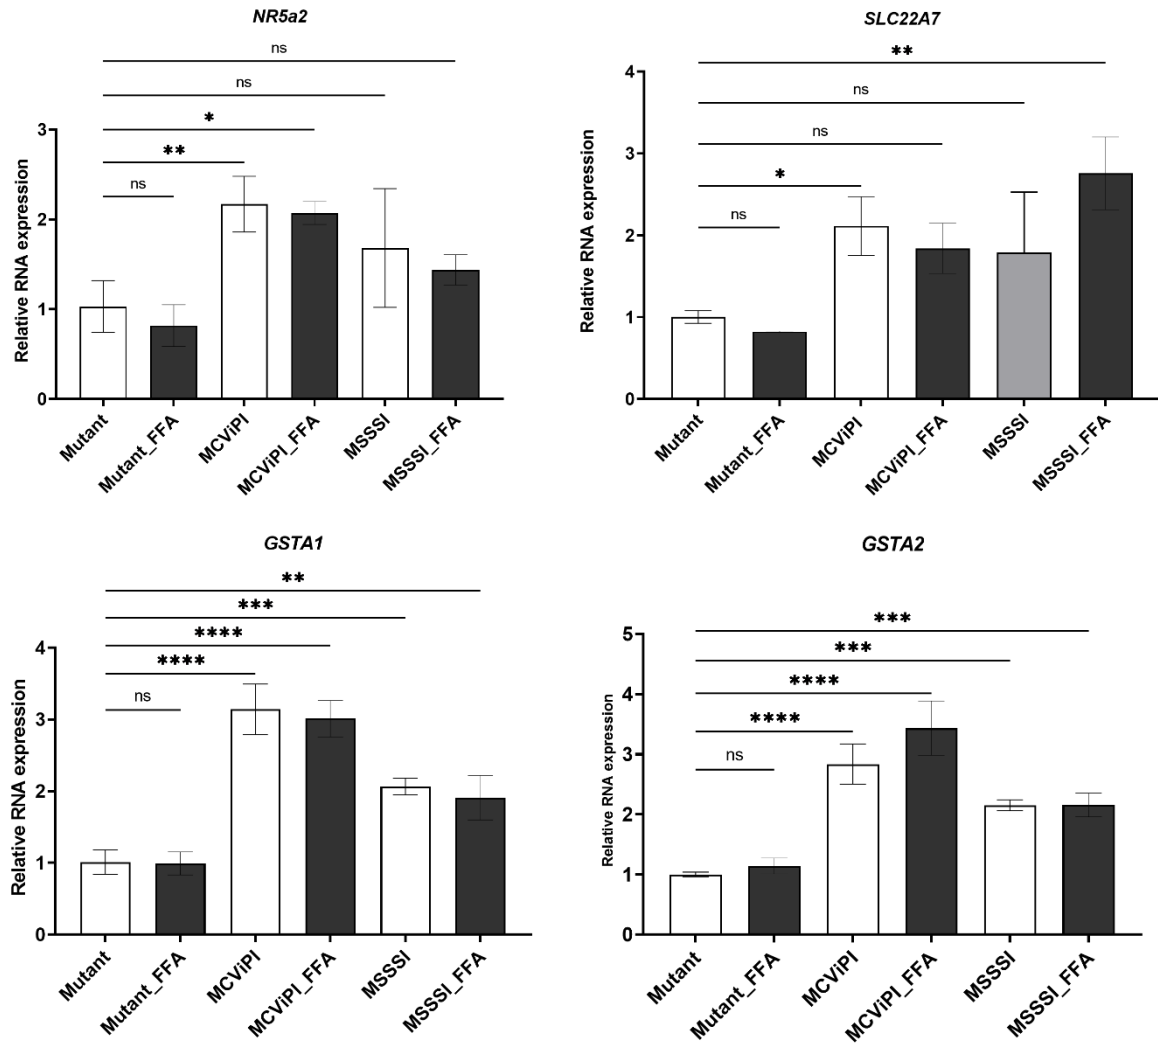

**Figure S4:** qPCR validation of 4 differentially expressed genes in the 3 different cell lines (MCviPI Mutant (mutant), MSSSI and MCviPI) that are untreated (none) or treated with 1mM FFA for 24h. Data is shown as mean  $\pm$  s.d.; n=3 independent biological replicates (ns= not significant; \*p < 0.05, \*\*p < 0.01, \*\*\*p < 0.001, \*\*\*\*p < 0.0001, One-way ANOVA with Tukey's correction for multiple comparisons).



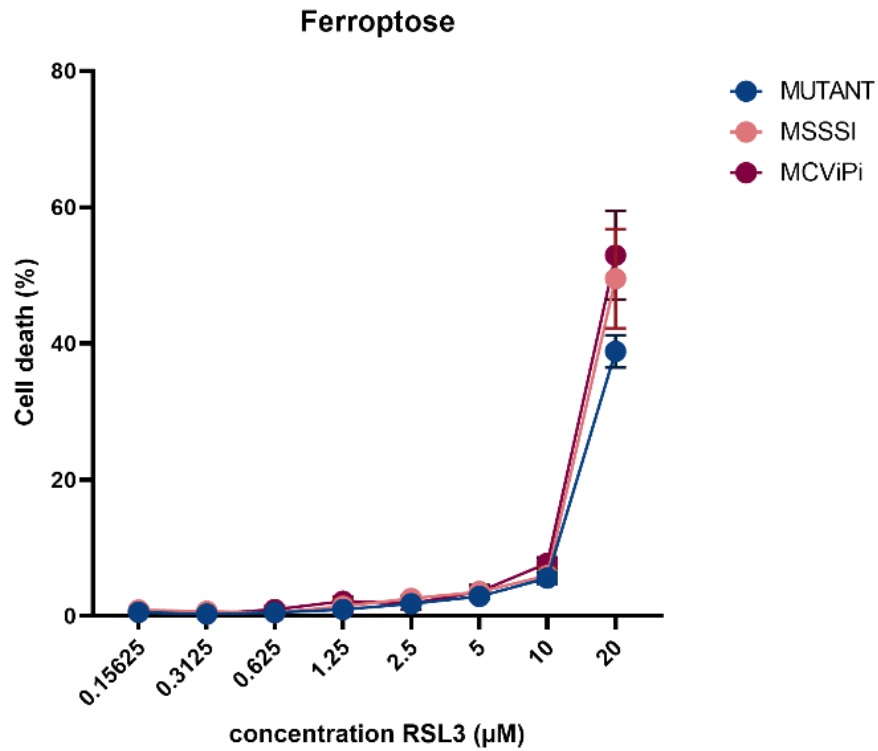

**Figure S6:** Ferroptosis sensitivity screening in MSSSI and MCViPI overexpressing cell lines versus MCViPI mutant overexpressing cell line. Cell death assay with SYBR green after treatment with different concentrations of the ferroptosis inducer RSL3 in all different untreated cell lines. (n=3 independent biological replicates).
